# Supplementary material for: Do Breastfeeding History and Diet Quality Predict Inhibitory Control at Preschool Age?
Source: MDPI journal article supplement (doi:10.3390/nu13082752), 2021-08-10
Supplement: s1 [file s1]

## Supplementary materials

Table S1. Correlations between mother and partner reports.

|   | 1. BRIEF-P<br>inh (M) | 2. BRIEF-P<br>inh (P) | 3. BRIEF-P<br>total (M) | 4. BRIEF-P<br>total (P) | 5. REEF<br>(M) | 6. REEF<br>(P) | 7. BRIEF-A<br>(M) | 8. BRIEF-A<br>(P) |
|---|-----------------------|-----------------------|-------------------------|-------------------------|----------------|----------------|-------------------|-------------------|
| 1 | -                     |                       |                         |                         |                |                |                   |                   |
| 2 | 0.415**               | -                     |                         |                         |                |                |                   |                   |
| 3 | 0.800**               | 0.539**               | -                       |                         |                |                |                   |                   |
| 4 | 0.248                 | 0.857**               | 0.535**                 | -                       |                |                |                   |                   |
| 5 | -0.426**              | -0.279*               | -0.461**                | -0.259                  | -              |                |                   |                   |
| 6 | -0.182                | -0.182                | -0.181                  | -0.147                  | 0.407**        | -              |                   |                   |
| 7 | 0.359*                | 0.366*                | 0.354**                 | 0.318*                  | 0.033          | -0.067         | -                 |                   |
| 8 | 0.256                 | 0.428**               | 0.324*                  | 0.518*                  | -0.178         | -0.049         | 0.385**           | -                 |

Correlations are denoted as  $r$ . BRIEF-P inh: Score of the inhibitory control scale of the BRIEF-P; BRIEF-P total: Total

score of the BRIEF-P; (M): Questionnaire filled in by mother; (P): Questionnaire filled in by partner.

\* indicates a p-value lower than 0.05, \*\* indicates a p-value lower than 0.01

Table S2. Correlations between potential confounding variables and independent and outcome variables.

|                              | Maternal<br>educational level | BRIEF-A-comp | Child Gender |
|------------------------------|-------------------------------|--------------|--------------|
| <b>Breastfeeding data</b>    |                               |              |              |
| Exclusive breastfeeding      | 0.191                         | 0.126        | -0.026       |
| Breastfeeding cessation age  | 0.290*                        | -0.042       | 0.098        |
| <b>Behavioral tasks</b>      |                               |              |              |
| Flanker                      | 0.106                         | -0.006       | -0.289*      |
| Whisper                      | -0.002                        | 0.102        | -0.124       |
| Gift Wrap                    | 0.063                         | -0.179       | 0.396**      |
| Gift Delay                   | 0.433***                      | -0.270*      | 0.140        |
| Inhibitory control composite | 0.217                         | -0.250*      | 0.132        |
| <b>Questionnaires</b>        |                               |              |              |
| BRIEF-P-inh                  | 0.008                         | 0.351**      | 0.157        |
| BRIEF-P                      | -0.084                        | 0.437 ***    | -0.012       |
| REEF                         | 0.080                         | -0.019       | 0.021        |

Correlations are denoted as  $r$ . BRIEF-P-inh: Score of the inhibitory control scale of the BRIEF-P. BRIEF-A-comp:

Composite score of the BRIEF-A filled in by mother and partner. Child gender: 1= boy, 2= girl.

\* $p < 0.05$ . \*\* $p < 0.01$ . \*\*\* $p < 0.001$

Table S3. Parameter Estimates and bootstrapped Confidence Intervals for models 7 and 8.

|                                                                                                           | B        | SE    | Lower CI | Upper CI |
|-----------------------------------------------------------------------------------------------------------|----------|-------|----------|----------|
| Model 7: Exclusive breastfeeding duration → diet quality score → reported executive functioning (BRIEF-P) |          |       |          |          |
| <b>Regression Paths</b>                                                                                   |          |       |          |          |
| Reported Executive functioning (BRIEF-P)                                                                  |          |       |          |          |
| Exclusive breastfeeding duration                                                                          | -0.242   | 1.198 | -2.590   | 2.107    |
| Diet quality score                                                                                        | 1.007    | 1.484 | -1.902   | 3.917    |
| Parental executive functioning                                                                            | 0.763*** | 0.056 | 0.653    | 0.873    |
| Diet quality score                                                                                        |          |       |          |          |
| Exclusive breastfeeding duration                                                                          | 0.173*   | 0.070 | 0.035    | 0.310    |
| <b>Mediation effect</b>                                                                                   | 0.174    | 0.260 | -0.336   | 0.684    |
| <b>Total effect</b>                                                                                       | 0.695    | 1.083 | -1.429   | 2.818    |
| Model 8: Breastfeeding cessation age → diet quality score → reported executive functioning (BRIEF-P)      |          |       |          |          |
| <b>Regression Paths</b>                                                                                   |          |       |          |          |
| Reported Executive functioning (BRIEF-P)                                                                  |          |       |          |          |
| Breastfeeding cessation age                                                                               | 0.338    | 0.204 | -0.061   | 0.738    |
| Diet quality score                                                                                        | 1.143    | 1.364 | -1.531   | 3.817    |
| Parental executive functioning                                                                            | 0.801*** | 0.081 | 0.642    | 0.960    |
| Maternal educational level                                                                                | -1.272   | 1.257 | -3.736   | 1.191    |
| Diet quality score                                                                                        |          |       |          |          |
| Breastfeeding cessation age                                                                               | 0.154    | 0.131 | -0.102   | 0.411    |
| <b>Mediation effect</b>                                                                                   | 0.177    | 0.223 | -0.260   | 0.613    |
| <b>Total effect</b>                                                                                       | 0.044    | 1.123 | -2.158   | 2.245    |

MLR estimator used to calculate parameter estimates, bootstrapping used to calculate bias-corrected confidence

intervals. Model 7:  $X^2(3)=1.043$ ,  $p=0.307$ ; CFI = 0.998, RMSEA = 0.024, SRMR = 0.032,  $n=67$ . Model 8:  $X^2(4)= 1.817$ ,

$p=0.611$ , RMSEA = 0.000 , SRMR = 0.046,  $n=67$ .

\* $p < 0.05$ . \*\*\* $p < 0.001$ .

Table S4. Parameter Estimates and bootstrapped Confidence Intervals for Exploratory Models 1, 2, 5, 6, 7, and 8.<sup>†</sup>

|                                                                                             | B       | SE    | Lower CI | Upper CI |
|---------------------------------------------------------------------------------------------|---------|-------|----------|----------|
| Exploratory model 1: Exclusive breastfeeding duration → Diet quality score → Flanker        |         |       |          |          |
| <b>Regression Paths</b>                                                                     |         |       |          |          |
| Flanker task                                                                                |         |       |          |          |
| Exclusive breastfeeding duration                                                            | 0.059   | 0.048 | -0.035   | 0.153    |
| Diet quality score                                                                          | -0.065  | 0.098 | -0.257   | 0.128    |
| Gender                                                                                      | -0.313  | 0.211 | -0.726   | 0.099    |
| Diet quality score                                                                          |         |       |          |          |
| Exclusive breastfeeding duration                                                            | 0.223** | 0.072 | 0.081    | 0.365    |
| <b>Mediation effect</b>                                                                     | -0.014  | 0.021 | -0.056   | 0.028    |
| <b>Total effect</b>                                                                         | -0.269  | 0.225 | -0.710   | 0.173    |
| Exploratory model 2: Breastfeeding cessation age → diet quality score → Flanker             |         |       |          |          |
| <b>Regression Paths</b>                                                                     |         |       |          |          |
| Flanker task                                                                                |         |       |          |          |
| Breastfeeding cessation age                                                                 | 0.026*  | 0.012 | 0.003    | 0.048    |
| Diet quality score                                                                          | -0.062  | 0.087 | -0.234   | 0.109    |
| Gender                                                                                      | -0.406* | 0.188 | -0.775   | -0.036   |
| Maternal educational level                                                                  | 0.046   | 0.054 | -0.059   | 0.151    |
| Diet quality score                                                                          |         |       |          |          |
| Breastfeeding cessation age                                                                 | 0.029   | 0.018 | -0.007   | 0.065    |
| <b>Mediation effect</b>                                                                     | -0.002  | 0.003 | -0.007   | 0.003    |
| <b>Total effect</b>                                                                         | -0.336  | 0.190 | -0.709   | 0.036    |
| Exploratory model 5: Exclusive breastfeeding duration → Diet quality score → Gift Wrap task |         |       |          |          |
| <b>Regression Paths</b>                                                                     |         |       |          |          |
| Gift Wrap                                                                                   |         |       |          |          |
| Exclusive breastfeeding duration                                                            | -0.093  | 0.048 | -0.188   | 0.001    |
| Diet quality score                                                                          | 0.168   | 0.092 | -0.013   | 0.349    |
| Gender                                                                                      | 0.683** | 0.204 | 0.283    | 1.082    |
| Diet quality score                                                                          |         |       |          |          |
| Exclusive breastfeeding duration                                                            | 0.155*  | 0.071 | 0.016    | 0.293    |
| <b>Mediation effect</b>                                                                     | 0.026   | 0.019 | -0.011   | 0.063    |
| <b>Total effect</b>                                                                         | -0.067  | 0.044 | -0.153   | 0.018    |
| Exploratory model 6: Breastfeeding cessation age → Diet quality score → Gift Wrap task      |         |       |          |          |
| <b>Regression Paths</b>                                                                     |         |       |          |          |

|                                                                                                 |          |       |        |        |
|-------------------------------------------------------------------------------------------------|----------|-------|--------|--------|
| Gift Wrap task                                                                                  |          |       |        |        |
| Breastfeeding cessation age                                                                     | -0.008   | 0.011 | -0.030 | 0.015  |
| Diet quality score                                                                              | 0.114    | 0.092 | -0.066 | 0.295  |
| Gender                                                                                          | 0.727*** | 0.196 | 0.343  | 1.112  |
| Maternal educational level                                                                      | 0.091    | 0.059 | -0.026 | 0.207  |
| Diet quality score                                                                              |          |       |        |        |
| Breastfeeding cessation age                                                                     | 0.156    | 0.121 | -0.082 | 0.393  |
| <b>Mediation effect</b>                                                                         | 0.018    | 0.019 | -0.020 | 0.056  |
| <b>Total effect</b>                                                                             | 0.828*** | 0.174 | 0.487  | 1.169  |
| <hr/>                                                                                           |          |       |        |        |
| Exploratory model 7: Exclusive breastfeeding duration<br>→ Diet quality score → Gift Delay task |          |       |        |        |
| <b>Regression Paths</b>                                                                         |          |       |        |        |
| Gift Delay task                                                                                 |          |       |        |        |
| Exclusive breastfeeding duration                                                                | 1.260    | 1.414 | -1.511 | 4.032  |
| Diet quality score                                                                              | -1.790   | 2.187 | -6.076 | 2.497  |
| Parental executive functioning                                                                  | -0.441*  | 0.176 | -0.788 | -0.096 |
| Maternal educational level                                                                      | 6.195**  | 2.325 | 1.639  | 10.752 |
| Diet quality score                                                                              |          |       |        |        |
| Exclusive breastfeeding duration                                                                | 0.160*   | 0.068 | 0.027  | 0.294  |
| <b>Mediation</b>                                                                                | -0.287   | 0.399 | -1.069 | 0.495  |
| <b>Total model</b>                                                                              | 6.726**  | 2.496 | 1.834  | 11.619 |
| <hr/>                                                                                           |          |       |        |        |
| Exploratory model 8: Breastfeeding cessation age →<br>Diet quality score → Gift Delay task      |          |       |        |        |
| <b>Regression Paths</b>                                                                         |          |       |        |        |
| Gift Delay task                                                                                 |          |       |        |        |
| Breastfeeding cessation age                                                                     | 0.603    | 0.333 | -0.049 | 1.256  |
| Diet quality score                                                                              | -1.781   | 2.118 | -5.933 | 2.371  |
| Parental executive functioning                                                                  | -0.423*  | 0.167 | -0.751 | -0.096 |
| Maternal educational level                                                                      | 5.826*   | 2.255 | 1.406  | 10.247 |
| Diet quality score                                                                              |          |       |        |        |
| Breastfeeding cessation age                                                                     | 0.153    | 0.125 | -0.093 | 0.398  |
| <b>Mediation</b>                                                                                | -0.272   | 0.392 | -1.040 | 0.497  |
| <b>Total model</b>                                                                              | 0.332    | 0.443 | -0.537 | 1.200  |

MLR estimator used to calculate parameter estimates, bootstrapping used to calculate bias-corrected confidence

intervals. Exploratory model 1:  $X^2(3) = 0.696$ ,  $p = 0.404$ , CFI = 1.000, RMSEA = 0.000, SRMR = 0.035,  $n = 52$ . Exploratory

model 2:  $X^2(4) = 1.592$ ,  $p = 0.661$ ; CFI = 1.000, RMSEA = 0.000, SRMR = 0.047,  $n = 52$ . Exploratory model 5:  $X^2(2) =$

0.980,  $p = 0.613$ ; CFI = 1.000, RMSEA = 0.000, SRMR = 0.034,  $n = 65$ . Exploratory model 6:  $X^2(3) = 2.079$ ,  $p = 0.721$ ; CFI =

---

1.000, RMSEA = 0.000, SRMR = 0.047, n=65. Exploratory model 7:  $X^2(4) = 1.881$ ,  $p = 0.598$ ; CFI = 1.000, RMSEA = 0.000, SRMR = 0.045, n=66. Exploratory model 8:  $X^2(4) = 1.765$ ,  $p = 0.623$ , CFI = 1.000, RMSEA = 0.000, SRMR = 0.044, n=66.

\* $p < 0.05$ . \*\* $p < 0.01$ . \*\*\* $p < 0.001$

† Model 3 (Exclusive breastfeeding duration → Diet quality score → Whisper) and Model 4 (Breastfeeding cessation age → Diet quality score → Whisper) could not be fitted; therefore no parameter estimates could be produced.

Table S5. Parameter Estimates and bootstrapped Confidence Intervals for Exploratory Models 9a, 10a, 11a, 12a, and 14a.<sup>†</sup>

|                                                                                                             | <b>B</b> | <b>SE</b> | <b>Lower CI</b> | <b>Upper CI</b> |
|-------------------------------------------------------------------------------------------------------------|----------|-----------|-----------------|-----------------|
| Exploratory model 9a: Exclusive breastfeeding duration → Vegetable intake → Executive functioning (BRIEF-P) |          |           |                 |                 |
| <b>Regression Paths</b>                                                                                     |          |           |                 |                 |
| Executive functioning (BRIEF-P)                                                                             |          |           |                 |                 |
| Exclusive breastfeeding duration                                                                            | 0.647    | 0.872     | -1.062          | 2.356           |
| Vegetable intake                                                                                            | -0.391   | 0.239     | -0.860          | 0.077           |
| Parental executive functioning                                                                              | 0.363*** | 0.088     | 0.190           | 0.535           |
| Vegetable intake                                                                                            |          |           |                 |                 |
| Exclusive breastfeeding duration                                                                            | 0.092    | 0.461     | -0.812          | 0.996           |
| <b>Mediation effect</b>                                                                                     | -0.036   | 0.185     | -0.400          | 0.327           |
| <b>Total effect</b>                                                                                         | 0.974    | 0.892     | -0.775          | 2.723           |
| Exploratory model 10a: Breastfeeding cessation age → Vegetable intake → Executive functioning (BRIEF-P)     |          |           |                 |                 |
| <b>Regression Paths</b>                                                                                     |          |           |                 |                 |
| Executive functioning (BRIEF-P)                                                                             |          |           |                 |                 |
| Breastfeeding cessation age                                                                                 | 0.341    | 0.197     | -0.044          | 0.726           |
| Vegetable intake                                                                                            | -0.367   | 0.232     | -0.822          | 0.089           |
| Parental executive functioning                                                                              | 0.378*** | 0.088     | 0.205           | 0.550           |
| Maternal educational level                                                                                  | -1.004   | 1.141     | -3.247          | 1.239           |
| Vegetable intake                                                                                            |          |           |                 |                 |
| Breastfeeding cessation age                                                                                 | -0.033   | 0.108     | -0.246          | 0.179           |
| <b>Mediation effect</b>                                                                                     | 0.012    | 0.040     | -0.066          | 0.090           |
| <b>Total effect</b>                                                                                         | -0.274   | 1.129     | -2.486          | 1.939           |
| Exploratory model 11a: Exclusive breastfeeding duration → Fruit intake → Executive functioning (BRIEF-P)    |          |           |                 |                 |
| <b>Regression Paths</b>                                                                                     |          |           |                 |                 |
| Executive functioning (BRIEF-P)                                                                             |          |           |                 |                 |
| Exclusive breastfeeding duration                                                                            | 0.452    | 0.932     | -1.374          | 2.278           |
| Fruit intake                                                                                                | 0.150    | 0.222     | -0.285          | 0.584           |
| Parental executive functioning                                                                              | 0.352*** | 0.087     | 0.182           | 0.522           |
| Fruit intake                                                                                                |          |           |                 |                 |

|                                                                                                                  |          |       |        |       |
|------------------------------------------------------------------------------------------------------------------|----------|-------|--------|-------|
| Exclusive breastfeeding duration                                                                                 | 1.215*   | 0.538 | 0.160  | 2.270 |
| <b>Mediation effect</b>                                                                                          | 0.178    | 0.291 | -0.392 | 0.748 |
| <b>Total effect</b>                                                                                              | 0.981    | 0.889 | -0.761 | 2.724 |
| <hr/>                                                                                                            |          |       |        |       |
| Exploratory model 12a: Breastfeeding cessation age →<br>Fruit intake → Executive functioning (BRIEF-P)           |          |       |        |       |
| <b>Regression Paths</b>                                                                                          |          |       |        |       |
| Executive functioning (BRIEF-P)                                                                                  |          |       |        |       |
| Breastfeeding cessation age                                                                                      | 0.338    | 0.201 | -0.055 | 0.731 |
| Fruit intake                                                                                                     | 0.132    | 0.202 | -0.264 | 0.528 |
| Parental executive functioning                                                                                   | 0.362*** | 0.090 | 0.185  | 0.538 |
| Maternal educational level                                                                                       | -0.940   | 1.284 | -3.457 | 1.576 |
| Fruit intake                                                                                                     |          |       |        |       |
| Breastfeeding cessation age                                                                                      | 0.107    | 0.110 | -0.108 | 0.322 |
| <b>Mediation</b>                                                                                                 | 0.014    | 0.029 | -0.043 | 0.071 |
| <b>Total model</b>                                                                                               | -0.227   | 1.271 | -2.718 | 2.265 |
| <hr/>                                                                                                            |          |       |        |       |
| Exploratory model 14a: Breastfeeding cessation age →<br>Snack and Candy intake → Executive functioning (BRIEF-P) |          |       |        |       |
| <b>Regression Paths</b>                                                                                          |          |       |        |       |
| Executive functioning (BRIEF-P)                                                                                  |          |       |        |       |
| Breastfeeding cessation age                                                                                      | 0.347    | 0.199 | -0.043 | 0.736 |
| Snack and candy intake                                                                                           | -0.076   | 0.546 | -1.146 | 0.994 |
| Parental executive functioning                                                                                   | 0.358*** | 0.096 | 0.170  | 0.545 |
| Maternal educational level                                                                                       | -1.048   | 1.274 | -3.546 | 1.449 |
| Snack and candy intake                                                                                           |          |       |        |       |
| Breastfeeding cessation age                                                                                      | -0.075   | 0.043 | -0.159 | 0.009 |
| <b>Mediation</b>                                                                                                 | 0.006    | 0.042 | -0.076 | 0.087 |
| <b>Total model</b>                                                                                               | -0.338   | 1.260 | -2.808 | 2.132 |

MLR estimator used to calculate parameter estimates, bootstrapping used to calculate bias-corrected confidence intervals. Exploratory model 9a:  $X^2(3)=0.932$ ,  $p=0.334$ ; CFI = 1.000, RMSEA = 0.000, SRMR = 0.033. Results based on N=67. Exploratory model 10a:  $X^2(3)=1.292$ ,  $p=0.863$ ; CFI = 1.000, RMSEA = 0.000, SRMR = 0.038. Results based on N=67. Exploratory model 11a:  $X^2(3)=0.684$ ,  $p=0.408$ ; CFI = 1.000, RMSEA = 0.000, SRMR = 0.025. Results based on N=67. Exploratory model 12a:  $X^2(3)=2.060$ ,  $p=0.725$ ; CFI = 1.000, RMSEA = 0.000, SRMR = 0.049. Results based on



---

N=67. Results based on N=66. Exploratory model 14a:  $\chi^2(3)=1.939$ ,  $p=0.747$ ; CFI = 1.000, RMSEA = 0.000, SRMR = 0.049. Results based on N=67.

\* $p < 0.05$ . \*\*\* $p < 0.001$ .

†Model 13a (Exclusive breastfeeding duration → Snack and Candy intake → Executive functioning (BRIEF-P)) could not be fitted; therefore no parameter estimates could be produced.

Table S6. Parameter Estimates and bootstrapped Confidence Intervals for Exploratory Models 9b, 10b, 11b, 13b, and 14b.<sup>†</sup>

|                                                                                                                 | <b>B</b> | <b>SE</b> | <b>Lower CI</b> | <b>Upper CI</b> |
|-----------------------------------------------------------------------------------------------------------------|----------|-----------|-----------------|-----------------|
| <b>Exploratory model 9b: Exclusive breastfeeding duration → Vegetable intake → Executive functioning (REEF)</b> |          |           |                 |                 |
| <b>Regression Paths</b>                                                                                         |          |           |                 |                 |
| Executive functioning (REEF)                                                                                    |          |           |                 |                 |
| Exclusive breastfeeding duration                                                                                | -1.959   | 1.530     | -4.958          | 1.041           |
| Vegetable intake                                                                                                | 0.379    | 0.586     | -0.769          | 1.528           |
| Maternal educational level                                                                                      | 3.239    | 2.258     | -1.186          | 7.665           |
| Vegetable intake                                                                                                |          |           |                 |                 |
| Exclusive breastfeeding duration                                                                                | 0.077    | 0.461     | -0.826          | 0.981           |
| <b>Mediation effect</b>                                                                                         | 0.029    | 0.173     | -0.310          | 0.368           |
| <b>Total effect</b>                                                                                             | 1.310    | 2.446     | -3.484          | 6.103           |
| <b>Exploratory model 10b: Breastfeeding cessation age → Vegetable intake → Executive functioning (REEF)</b>     |          |           |                 |                 |
| <b>Regression Paths</b>                                                                                         |          |           |                 |                 |
| Executive functioning (REEF)                                                                                    |          |           |                 |                 |
| Breastfeeding cessation age                                                                                     | -0.202   | 0.341     | -0.870          | 0.466           |
| Vegetable intake                                                                                                | 0.369    | 0.596     | -0.799          | 1.538           |
| Maternal educational level                                                                                      | 3.087    | 2.215     | -1.255          | 7.429           |
| Vegetable intake                                                                                                |          |           |                 |                 |
| Breastfeeding cessation age                                                                                     | -0.006   | 0.108     | -0.218          | 0.206           |
| <b>Mediation effect</b>                                                                                         | -0.014   | 0.047     | -0.107          | 0.079           |
| <b>Total effect</b>                                                                                             | 2.870    | 2.157     | -1.358          | 7.099           |
| <b>Exploratory model 11b: Exclusive breastfeeding duration → Fruit intake → Executive functioning (REEF)</b>    |          |           |                 |                 |
| <b>Regression Paths</b>                                                                                         |          |           |                 |                 |
| Executive functioning (REEF)                                                                                    |          |           |                 |                 |
| Exclusive breastfeeding duration                                                                                | -2.547   | 1.713     | -5.905          | 0.812           |
| Fruit intake                                                                                                    | 0.443    | 0.381     | -0.304          | 1.191           |
| Maternal educational level                                                                                      | 3.732    | 2.257     | -0.692          | 8.156           |
| Fruit intake                                                                                                    |          |           |                 |                 |
| Exclusive breastfeeding duration                                                                                | 1.263**  | 0.470     | 0.341           | 2.185           |
| <b>Mediation effect</b>                                                                                         | 0.560    | 0.588     | -0.592          | 1.712           |
| <b>Total effect</b>                                                                                             | 1.746    | 2.383     | -2.925          | 6.417           |
| <b>Exploratory model 13b: Exclusive breastfeeding</b>                                                           |          |           |                 |                 |
| <b>Regression Paths</b>                                                                                         |          |           |                 |                 |

|                                                                                                            | duration → Snacks and candy intake → Executive functioning (REEF) |       |        |       |
|------------------------------------------------------------------------------------------------------------|-------------------------------------------------------------------|-------|--------|-------|
| Executive functioning (REEF)                                                                               |                                                                   |       |        |       |
| Exclusive breastfeeding duration                                                                           | -1.943                                                            | 1.599 | -5.077 | 1.192 |
| Snacks and candy intake                                                                                    | 0.163                                                             | 0.805 | -1.415 | 1.740 |
| Maternal educational level                                                                                 | 3.296                                                             | 2.199 | -1.015 | 7.606 |
| Fruit intake                                                                                               |                                                                   |       |        |       |
| Exclusive breastfeeding duration                                                                           | -0.310                                                            | 0.209 | -0.720 | 0.100 |
| <b>Mediation</b>                                                                                           | -0.050                                                            | 0.251 | -0.543 | 0.442 |
| <b>Total model</b>                                                                                         | 1.303                                                             | 2.367 | -3.336 | 5.941 |
| Exploratory model 14b: Breastfeeding cessation age → Snack and candy intake → Executive functioning (REEF) |                                                                   |       |        |       |
| <b>Regression Paths</b>                                                                                    |                                                                   |       |        |       |
| Executive functioning (REEF)                                                                               |                                                                   |       |        |       |
| Breastfeeding cessation age                                                                                | -0.230                                                            | 0.367 | -0.949 | 0.488 |
| Snack and candy intake                                                                                     | 0.274                                                             | 0.784 | -1.263 | 1.811 |
| Maternal educational level                                                                                 | 3.176                                                             | 2.169 | -1.075 | 7.426 |
| Snack and candy intake                                                                                     |                                                                   |       |        |       |
| Breastfeeding cessation age                                                                                | -0.076                                                            | 0.049 | -0.172 | 0.020 |
| <b>Mediation</b>                                                                                           | -0.021                                                            | 0.062 | -0.142 | 0.100 |
| <b>Total model</b>                                                                                         | 2.924                                                             | 2.097 | -1.186 | 7.035 |

MLR estimator used to calculate parameter estimates, bootstrapping used to calculate bias-corrected confidence intervals. Exploratory model 15:  $X^2(2) = 0.859$ ,  $p = 0.651$ ; CFI = 1.000, RMSEA = 0.000, SRMR = 0.034. Results based on  $N=67$ . Exploratory model 16:  $X^2(3) = 0.204$ ,  $p = 0.651$ ; CFI = 1.000, RMSEA = 0.000, SRMR = 0.016. Results based on  $N=67$ . Exploratory model 17:  $X^2(3) = 0.791$ ,  $p = 0.374$ ; CFI = 1.000, RMSEA = 0.000, SRMR = 0.034. Results based on  $N=67$ . Exploratory model 19:  $X^2(2) = 0.720$ ,  $p = 0.698$ ; CFI = 1.000, RMSEA = 0.000, SRMR = 0.032. Results based on  $N=67$ . Exploratory model 20:  $X^2(3) = 0.019$ ,  $p = 0.889$ ; CFI = 1.000, RMSEA = 0.000, SRMR = 0.005. Results based on  $N=67$ . \*\* $p < 0.01$ .

<sup>†</sup>Model 12b (Breastfeeding cessation age → Fruit intake → Executive functioning (REEF)) could not be fitted; therefore no parameter estimates were produced.
